# Supplementary material for: REDCAPP (v1.0): parameterizing valley inversions in air temperature data downscaled from reanalyses
Source: Copernicus journal article supplement (doi:10.5194/gmd-10-2905-2017), 2017-08-01
Supplement: Supplementary file 1 [file gmd-10-2905-2017-supplement.zip]

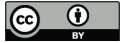

## *Supplement of*

# **REDCAPP (v1.0): parameterizing valley inversions in air temperature data downscaled from reanalyses**

**Bin Cao et al.**

*Correspondence to:* Bin Cao (caob08@lzu.edu.cn)

- gmd-10-2905-2017-supplement-title-page.pdf
- REDCAPP
  - LICENSE
  - README.md
  - data
    - \* DEM.asc
    - \* DEM\_small.asc
    - \* ecmwf\_erai\_pl\_m\_151201\_151205.nc
    - \* ecmwf\_erai\_sa\_m\_151201\_151205.nc
    - \* ecmwf\_erai\_to.nc
  - ecmwfapi
    - \* \_\_init\_\_.py
    - \* \_\_init\_\_.pyc
    - \* api.py
    - \* api.pyc
  - redcapp.py
  - redcapp.pyc
  - redcapp\_example.py

The copyright of individual parts of the supplement might differ from the CC BY 3.0 License.
